# Supplementary material for: Time-Dependent Effect of Hypoxia on Tumor Progression and Liver Progenitor Cell Markers in Primary Liver Tumors
Source: PubMed Central journal article supplement (PMC4368520; doi:10.1371/journal.pone.0119555), 2015-03-20
Supplement: pone.0119555.s001.pdf [file pone.0119555.s001.pdf]

**Table SI: Genes and primersets**

| Gene ID | short  | Full name                                       | Forward primer              | Reversed primer                | Marker     |
|---------|--------|-------------------------------------------------|-----------------------------|--------------------------------|------------|
| 14433   | GAPDH  | glyceraldehyde 3 phosphate dehydrogenase        | CATGGCCTTCCGTGTTCTTA        | GCGGCACGTCAGATCCA              | Reference  |
| 15288   | HMBS   | hydroxymethyl-bilane synthase                   | AAG GGC TTT TCT GAG GCA CC  | AGT TGC CCA TCT TTC ATC ACT G  | Reference  |
| 15452   | HPRT   | hypoxanthine guanine phosphoribosyl transferase | GTT AAG CAG TAC AGC CCC AAA | AGG GCA TAT CCA ACA ACA AAC TT | Reference  |
| 66945   | SDHA   | succinate dehydrogenase complex, subunit A      | CTTGAATGAGGCTGACTGTG        | ATCACATAAGCTGGTCTGT            | Reference  |
| 11576   | AFP    | alpha – fetoprotein                             | AGCTTCCACGTTAGATTCTCC       | ACAAACTGGGTAAGGTGATGG          | LPC        |
| 16669   | KRT19  | Cytokeratin 19                                  | GTTCAGTACGCATTGGGTGAG       | GAGGACGAGGTCACGAAGC            | LPC        |
| 110310  | CK7    | Cytokeratin 7                                   | AGGAGATCAACCGACGCAC         | CACCTTGTTTCGTGTAGGCG           | LPC        |
| 12505   | CD44   | CD44 antigen                                    | tcgatttgaatgtaacctgccg      | CAGTCCGGGAGATACTGTAGC          | LPC        |
| 19126   | PROM1  | Prominin 1                                      | CTCCCATCAGTGGATAGAGAAGT     | ATACCCCCTTTTGACGAGGCT          | LPC        |
| 17075   | EPCAM  | Epithelial cell adhesion molecule               | GCGGCTCAGAGAGACTGTG         | CCAAGCATTAGACGCCAGTTT          | LPC        |
| 16410   | ITGAV  | Integrine alpha 5                               | CAATTGCTGCTCCCTATGGT        | GATTTGAGATGGCACCGAAT           | Metastasis |
| 17395   | MMP9   | Matrix metalloproteinase 9                      | GAGACGGGTATCCCTTCGAC        | TGACATGGGGCACCATTGAG           | Metastasis |
| 16449   | JAG1   | Jagged 1                                        | ATGCAGAACGTGAATGGAGAG       | GCGGGACTGATACTCCTTGAG          | NOTCH      |
| 18128   | NOTCH1 | Notch 1                                         | GATGGCCTCAATGGGTACAAG       | TCGTTGTTGTTGATGTCACAGT         | NOTCH      |
| 18129   | NOTCH2 | Neurogenic locus notch homolog protein 2        | ATGTGGACGAGTGTCTGTTGC       | GGAAGCATAGGCACAGTCATC          | NOTCH      |
| 18131   | NOTCH3 | Neurogenic locus notch homolog protein 3        | AGTGCCGATCTGGTACAAGTT       | CACTACGGGGTTCTCACACA           | NOTCH      |
| 15205   | HES1   | Hairy enhancer of split 1                       | ACGTGCGAGGGCGTTAATAC        | ACGTGCGAGGGCGTTAATAC           | NOTCH      |
| 22339   | VEGFa  | Vascular endothelial growth factor A            | ACTCGGATGCCGACACGGGA        | CCTGGCCTTGCTTCTCCCC            | Hypoxia    |
| 20525   | Glut1  | Glucose transporter 1                           | GCT TAT GGG CTT CTC CAA ACT | GT GAC ACC TCT CCC ACA TAC     | Hypoxia    |
| 18642   | Pfk    | Phosphofructokinase                             | GCCGGCTCAGTGAGACAAG         | TGGCACCTTCAGCAACAATG           | Hypoxia    |
